# Supplementary material for: Clinical safety and efficacy of vitamin D3 analog ointment for treatment of obstructive meibomian gland dysfunction
Source: BMC Ophthalmol. 2017 Jun 7;17:84. doi: 10.1186/s12886-017-0482-7 (PMC5463421; doi:10.1186/s12886-017-0482-7)
Supplement: Additional file 1: — Detailed data of the subjects at pre-, one months after and two months after treatment with Vit D3. (XLSX 18 kb) [file 12886_2017_482_MOESM1_ESM.xlsx]

## Sheet: Pre VitD
name	Age	Gender	R/L	plugging	Irregularity	Vascularity	MCJ replacement	BUT	SPK	meibum	Shirmer	%of MG(U)	%of MG(L)		symptoms
Pt #1	65	M	R	3	1	2	1	1	1	3	8	10.91	15.8	13.355	11
			L	3	1	2	1	1	1	3	6	6.35	12.59	9.47	11
Pt #2	62	F	L	1	1	1	1	2	0	2	5	26	9.83	17.915	6
Pt #3	58	F	R	2	2	2	2	2	1	3	6	18.92	16.48	17.7	6
			L	2	2	2	2	2	1	3	7	23.34	15.61	19.475	9
Pt #4	68	F	R	1	1	1	1	3	1	2	7	33.36	19.51	26.435	9
			L	1	1	1	1	3	0	2	6	34.41	28.95	31.68	7
Pt #5	35	M	L	1	1	1	1	4	0	1	6	34.07	28.42	31.245	5
Pt #6	45	M	R	1	0	1	0	4	0	1	8	30.86	16.91	23.885	5
Pt #7	58	M	R	2	1	1	1	5	0	2	6	31.47	27.03	29.25	4
			L	2	1	1	1	5	0	2	8	32.18	38.72	35.45	6
Pt #8	27	M	L	2	0	1	0	3	1	0	5	39	25.42	32.21	4

## Sheet: 1M after Vit D 
name	Age	Gender	R/L	plugging	Irregularity	Vascularity	MCJ replacement	BUT	SPK	meibum	Shirmer	%of MG(U)	%of MG(L)		symptoms
Pt #1	65	M	R	2	1	1	1	3	1	2	8	12.35	16.58	14.465	5
			L	2	1	1	1	2	1	2	7	36.51	20.78	21.555	5
Pt #2	62	F	L	1	1	1	1	2	0	2	5	30.37	19.52	26.795	3
Pt #3	58	F	R	1	1	1	1	3	0	2	6	23.13	16.48	22.375	3
			L	1	1	1	1	3	1	2	7	23.34	21.87	21.205	6
Pt #4	68	F	R	0	1	0	1	5	0	1	8	34.9	19.51	24.905	6
			L	0	1	0	1	5	0	1	6	33.89	31.82	30.03	4
Pt #5	35	M	L	0	1	0	1	5	0	0	6	36.43	31.19	33.3325	3
Pt #6	45	M	R	1	0	0	0	4	0	1	8	30.99	18.21	29.205	3
Pt #7	58	M	R	1	1	1	1	7	0	2	8	32.94	45.64	31.945	3
			L	1	1	1	1	7	0	1	8	32.94	45.64	39.29	4
Pt #8	27	M	L	1	0	0	0	4	1	0	6	43.1	29.21	37.7225	3

## Sheet: 2M after Vit D
name	Age	Gender	R/L	plugging	Irregularity	Vascularity	MCJ replacement	BUT	SPK	meibum	Shirmer	%of MG(U)	%of MG(L)		symptoms
Pt #1	65	M	R	1	1	1	1	4	0	2	7	36.29	26.54	31.415	1
			L	1	1	1	1	3	0	2	8	40.14	27.39	33.765	1
Pt #2	62	F	L	1	1	1	1	5	0	1	5	33.79	25.62	29.705	2
Pt #3	58	F	R	1	1	1	1	3	0	1	6	24.85	16.11	20.48	5
			L	1	1	1	1	3	0	1	7	27.33	23.84	25.585	4
Pt #4	68	F	R	0	1	0	1	6	0	0	6	35.37	22.67	29.02	2
			L	0	1	0	1	5	0	0	6	40.33	31.66	35.995	3
Pt #5	35	M	L	0	1	0	1	5	0	0	6	36.43	31.19	33.81	3
Pt #6	45	M	R	0	0	0	0	6	0	0	8	30.99	18.13	24.56	2
Pt #7	58	M	R	0	1	1	0	10	0	1	8	45.76	41.69	43.725	1
			L	0	1	1	0	7	0	1	7	38.19	49.53	43.86	1
Pt #8	27	M	L	0	0	0	0	8	0	0	5	46.81	35.47	41.14	1
